# Supplementary material
Source: Elsevier journal article supplement (https://www.sciencedirect.com/science/article/pii/S1699258X17301778)
Supplement: mmc1 [file S1699258X17301778:mmc1.pdf]

## 1. Cuestionario de primer ronda Delphi.

**Tabla 1. Bloque A. Criterios de calidad de accesibilidad.**

| CRITERIO CALIDAD                                                                                                                                                                       | <b>RELEVANCIA</b><br><div style="text-align: center;"> 0 1 2 3 4 5 6 7 8 9 10<br/> ● — ●<br/> Completo desacuerdo      Completo acuerdo </div> | <b>FACTIBILIDAD</b><br><div style="text-align: center;"> 0 1 2 3 4 5 6 7 8 9 10<br/> ● — ●<br/> Completo desacuerdo      Completo acuerdo </div> |
|----------------------------------------------------------------------------------------------------------------------------------------------------------------------------------------|------------------------------------------------------------------------------------------------------------------------------------------------|--------------------------------------------------------------------------------------------------------------------------------------------------|
| 1. El tiempo transcurrido entre la petición de interconsulta a reumatología y la primera visita al reumatólogo ha sido inferior a 4 semanas.                                           |                                                                                                                                                |                                                                                                                                                  |
| <i>Si desea realizar algún comentario o aportar información al respecto, por favor, utilice este espacio.</i>                                                                          |                                                                                                                                                |                                                                                                                                                  |
| 2. El tiempo transcurrido desde la primera visita a reumatología y el establecimiento del diagnóstico de artritis reumatoide ha sido inferior a 2 semanas.                             |                                                                                                                                                |                                                                                                                                                  |
| <i>Si desea realizar algún comentario o aportar información al respecto, por favor, utilice este espacio.</i>                                                                          |                                                                                                                                                |                                                                                                                                                  |
| 3. El tiempo transcurrido desde la primera visita en reumatología y el inicio de metotrexato o primer fármacos modificador de la enfermedad convencional ha sido inferior a 2 semanas. |                                                                                                                                                |                                                                                                                                                  |

**Tabla 2. Bloque B: Criterios de calidad de adecuación científico-técnica.**

| CRITERIO CALIDAD                                                                                              | <b>RELEVANCIA</b><br><br><div style="text-align: center;"> 0   1   2   3   4   5   6   7   8   9   10<br/> ● ——— ●<br/> Completo desacuerdo                      Completo acuerdo </div> | <b>FACTIBILIDAD</b><br><br><div style="text-align: center;"> 0   1   2   3   4   5   6   7   8   9   10<br/> ● ——— ●<br/> Completo desacuerdo                      Completo acuerdo </div> |
|---------------------------------------------------------------------------------------------------------------|------------------------------------------------------------------------------------------------------------------------------------------------------------------------------------------|--------------------------------------------------------------------------------------------------------------------------------------------------------------------------------------------|
| 4. En la historia clínica consta que se ha recomendado dejar de fumar.                                        |                                                                                                                                                                                          |                                                                                                                                                                                            |
| <i>Si desea realizar algún comentario o aportar información al respecto, por favor, utilice este espacio.</i> |                                                                                                                                                                                          |                                                                                                                                                                                            |
| 5. En la historia clínica consta que se ha recomendado alcanzar y mantener el peso ideal.                     |                                                                                                                                                                                          |                                                                                                                                                                                            |
| <i>Si desea realizar algún comentario o aportar información al respecto, por favor, utilice este espacio.</i> |                                                                                                                                                                                          |                                                                                                                                                                                            |
| 6. En la historia clínica consta que se ha recomendado mantener una buena salud periodontal.                  |                                                                                                                                                                                          |                                                                                                                                                                                            |
| <i>Si desea realizar algún comentario o aportar información al respecto, por favor, utilice este espacio.</i> |                                                                                                                                                                                          |                                                                                                                                                                                            |

**Tabla 3. Bloque B: Criterios de calidad de adecuación científico-técnica (continuación).**

| CRITERIO CALIDAD                                                                                                                                                            | RELEVANCIA                                                                                   | FACTIBILIDAD                                                                                 |
|-----------------------------------------------------------------------------------------------------------------------------------------------------------------------------|----------------------------------------------------------------------------------------------|----------------------------------------------------------------------------------------------|
|                                                                                                                                                                             | <div>012345678910</div> <div>●●●●●●●●●●</div> <div>Completo desacuerdoCompleto acuerdo</div> | <div>012345678910</div> <div>●●●●●●●●●●</div> <div>Completo desacuerdoCompleto acuerdo</div> |
| 7. En la historia clínica consta que se ha realizado una evaluación explícita de factores de mal pronóstico como elemento determinante a la hora de escoger un tratamiento. |                                                                                              |                                                                                              |
| Si desea realizar algún comentario o aportar información al respecto, por favor, utilice este espacio.                                                                      |                                                                                              |                                                                                              |
| 8. En la historia clínica consta que se ha realizado una evaluación explícita de actividad como elemento determinante a la hora de escoger un tratamiento.                  |                                                                                              |                                                                                              |
| Si desea realizar algún comentario o aportar información al respecto, por favor, utilice este espacio.                                                                      |                                                                                              |                                                                                              |
| 9. Se ha realizado una radiografía de tórax antes de metotrexato.                                                                                                           |                                                                                              |                                                                                              |
| Si desea realizar algún comentario o aportar información al respecto, por favor, utilice este espacio.                                                                      |                                                                                              |                                                                                              |

Tabla 4. Bloque B: Criterios de calidad de adecuación científico-técnica (continuación).

| CRITERIO CALIDAD                                                                                                                                              | RELEVANCIA                                                                                   | FACTIBILIDAD                                                                                 |
|---------------------------------------------------------------------------------------------------------------------------------------------------------------|----------------------------------------------------------------------------------------------|----------------------------------------------------------------------------------------------|
|                                                                                                                                                               | <div>012345678910</div> <div>●●●●●●●●●●</div> <div>Completo desacuerdoCompleto acuerdo</div> | <div>012345678910</div> <div>●●●●●●●●●●</div> <div>Completo desacuerdoCompleto acuerdo</div> |
| 10. Se ha prescrito ácido fólico si se ha prescrito metotrexato.                                                                                              |                                                                                              |                                                                                              |
| Si desea realizar algún comentario o aportar información al respecto, por favor, utilice este espacio.                                                        |                                                                                              |                                                                                              |
| 11. Se ha prescrito dosis bajas de glucocorticoides como fármaco modificador de la enfermedad.                                                                |                                                                                              |                                                                                              |
| Si desea realizar algún comentario o aportar información al respecto, por favor, utilice este espacio.                                                        |                                                                                              |                                                                                              |
| 12. No se ha prescrito glucocorticoides a dosis superiores a 10 mg/día de prednisona o equivalente por periodos superiores a 1 mes.                           |                                                                                              |                                                                                              |
| Si desea realizar algún comentario o aportar información al respecto, por favor, utilice este espacio.                                                        |                                                                                              |                                                                                              |
| 13. En la historia clínica consta que se ha prescrito infiltraciones para articulaciones inflamadas en el seno de un buen control sistémico de la enfermedad. |                                                                                              |                                                                                              |
| Si desea realizar algún comentario o aportar información al respecto, por favor, utilice este espacio.                                                        |                                                                                              |                                                                                              |

**Tabla 5. Bloque B: Criterios de calidad de adecuación científico-técnica (continuación).**

| CRITERIO CALIDAD                                                                                                                                                                                                                              | RELEVANCIA                                                                                   | FACTIBILIDAD                                                                                 |
|-----------------------------------------------------------------------------------------------------------------------------------------------------------------------------------------------------------------------------------------------|----------------------------------------------------------------------------------------------|----------------------------------------------------------------------------------------------|
|                                                                                                                                                                                                                                               | <div>012345678910</div> <div>●●●●●●●●●●</div> <div>Completo desacuerdoCompleto acuerdo</div> | <div>012345678910</div> <div>●●●●●●●●●●</div> <div>Completo desacuerdoCompleto acuerdo</div> |
| 14. En la historia clínica consta que se ha aumentado la dosis de metotrexato hasta los 20 mg/semana antes de decidir que existe respuesta inadecuada a metotrexato, en ausencia de efectos adversos que obliguen a suspender el metotrexato. |                                                                                              |                                                                                              |
| Si desea realizar algún comentario o aportar información al respecto, por favor, utilice este espacio.                                                                                                                                        |                                                                                              |                                                                                              |
| 15. Se ha registrado la vía de administración del metotrexato.                                                                                                                                                                                |                                                                                              |                                                                                              |
| Si desea realizar algún comentario o aportar información al respecto, por favor, utilice este espacio.                                                                                                                                        |                                                                                              |                                                                                              |
| 16. En la historia clínica consta que se ha controlado al paciente cada mes hasta alcanzar remisión o baja actividad de la enfermedad.                                                                                                        |                                                                                              |                                                                                              |
| Si desea realizar algún comentario o aportar información al respecto, por favor, utilice este espacio.                                                                                                                                        |                                                                                              |                                                                                              |

Tabla 6. Bloque B: Criterios de calidad de adecuación científico-técnica (continuación).

| CRITERIO CALIDAD                                                                                                                                                                                                        | RELEVANCIA                                                                                   | FACTIBILIDAD                                                                                 |
|-------------------------------------------------------------------------------------------------------------------------------------------------------------------------------------------------------------------------|----------------------------------------------------------------------------------------------|----------------------------------------------------------------------------------------------|
|                                                                                                                                                                                                                         | <div>012345678910</div> <div>●●●●●●●●●●</div> <div>Completo desacuerdoCompleto acuerdo</div> | <div>012345678910</div> <div>●●●●●●●●●●</div> <div>Completo desacuerdoCompleto acuerdo</div> |
| 17. En la historia clínica consta que se han usado índices de actividad en las visitas (DAS28, SDAI, CDAI) o al menos recogida de sus componentes individuales (EVAs, recuentos articulares, reactantes de fase aguda). |                                                                                              |                                                                                              |
| Si desea realizar algún comentario o aportar información al respecto, por favor, utilice este espacio.                                                                                                                  |                                                                                              |                                                                                              |
| 18. En la historia clínica consta que se ha realizado intensificación terapéutica según objetivo prefijado.                                                                                                             |                                                                                              |                                                                                              |
| Si desea realizar algún comentario o aportar información al respecto, por favor, utilice este espacio.                                                                                                                  |                                                                                              |                                                                                              |
| 19. En la historia clínica consta que el paciente ha sido informado sobre la terapia por objetivos                                                                                                                      |                                                                                              |                                                                                              |
| Si desea realizar algún comentario o aportar información al respecto, por favor, utilice este espacio.                                                                                                                  |                                                                                              |                                                                                              |

**Tabla 7. Bloque B: Criterios de calidad de adecuación científico-técnica (continuación).**

| CRITERIO CALIDAD                                                                                                                                                                        | <b>RELEVANCIA</b><br><br> | <b>FACTIBILIDAD</b><br><br> |
|-----------------------------------------------------------------------------------------------------------------------------------------------------------------------------------------|-------------------------------------------------------------------------------------------------------------|----------------------------------------------------------------------------------------------------------------|
| 20. Al paciente se le ha prescrito doble o triple terapia con fármaco modificador de la enfermedad convencional antes de prescribir el primer agente biológico.                         |                                                                                                             |                                                                                                                |
| <i>Si desea realizar algún comentario o aportar información al respecto, por favor, utilice este espacio.</i>                                                                           |                                                                                                             |                                                                                                                |
| 21. Al paciente se le ha prescrito un segundo fármaco modificador de la enfermedad convencional en monoterapia o en terapia combinada antes de prescribirse el primer agente biológico. |                                                                                                             |                                                                                                                |
| <i>Si desea realizar algún comentario o aportar información al respecto, por favor, utilice este espacio.</i>                                                                           |                                                                                                             |                                                                                                                |
| 22. Se ha realizado radiografía de tórax y PPD antes del inicio del primer agente biológico.                                                                                            |                                                                                                             |                                                                                                                |
| <i>Si desea realizar algún comentario o aportar información al respecto, por favor, utilice este espacio.</i>                                                                           |                                                                                                             |                                                                                                                |
| 23. Se ha realizado determinación de serología VHB, VHC y VIH antes del 1 <sup>er</sup> biológico.                                                                                      |                                                                                                             |                                                                                                                |
| <i>Si desea realizar algún comentario o aportar información al respecto, por favor, utilice este espacio.</i>                                                                           |                                                                                                             |                                                                                                                |
| 24. Se ha monitorizado cada 6-8 meses al paciente tras alcanzar un adecuado control de la enfermedad.                                                                                   |                                                                                                             |                                                                                                                |
| <i>Si desea realizar algún comentario o aportar información al respecto, por favor, utilice este espacio.</i>                                                                           |                                                                                                             |                                                                                                                |

Tabla 8. Bloque B: Criterios de calidad de adecuación científico-técnica (continuación).

| CRITERIO CALIDAD                                                                                                                                                | RELEVANCIA                                                                                   | FACTIBILIDAD                                                                                 |
|-----------------------------------------------------------------------------------------------------------------------------------------------------------------|----------------------------------------------------------------------------------------------|----------------------------------------------------------------------------------------------|
|                                                                                                                                                                 | <div>012345678910</div> <div>●●●●●●●●●●</div> <div>Completo desacuerdoCompleto acuerdo</div> | <div>012345678910</div> <div>●●●●●●●●●●</div> <div>Completo desacuerdoCompleto acuerdo</div> |
| 25. Se ha realizado una monitorización radiológica cada 3-12 meses.                                                                                             |                                                                                              |                                                                                              |
| Si desea realizar algún comentario o aportar información al respecto, por favor, utilice el siguiente espacio.                                                  |                                                                                              |                                                                                              |
| 26. Se han realizado otras técnicas de imagen, como ecografía o resonancia magnética para monitorizar actividad inflamatoria subclínica.                        |                                                                                              |                                                                                              |
| Si desea realizar algún comentario o aportar información al respecto, por favor, utilice el siguiente espacio.                                                  |                                                                                              |                                                                                              |
| 27. En la historia clínica consta que las comorbilidades del paciente han sido tenidas en cuenta a la hora de diseñar tratamiento y fijar objetivo terapéutico. |                                                                                              |                                                                                              |
| Si desea realizar algún comentario o aportar información al respecto, por favor, utilice el siguiente espacio.                                                  |                                                                                              |                                                                                              |
| 28. En la historia clínica consta que se ha considerado la presencia de hipertensión arterial.                                                                  |                                                                                              |                                                                                              |
| Si desea realizar algún comentario o aportar información al respecto, por favor, utilice el siguiente espacio.                                                  |                                                                                              |                                                                                              |



**Tabla 9. Bloque B: Criterios de calidad de adecuación científico-técnica (continuación).**

| CRITERIO CALIDAD                                                                                                                          | RELEVANCIA                                                                                                                                      | FACTIBILIDAD                                                                                                                                    |
|-------------------------------------------------------------------------------------------------------------------------------------------|-------------------------------------------------------------------------------------------------------------------------------------------------|-------------------------------------------------------------------------------------------------------------------------------------------------|
|                                                                                                                                           | <div> <div>012345678910</div> <div> <div>●●●●●●●●●●</div> <div> <div>Completo desacuerdo</div> <div>Completo acuerdo</div> </div> </div> </div> | <div> <div>012345678910</div> <div> <div>●●●●●●●●●●</div> <div> <div>Completo desacuerdo</div> <div>Completo acuerdo</div> </div> </div> </div> |
| 29. En la historia clínica consta que se ha considerado la presencia de dislipemia.                                                       |                                                                                                                                                 |                                                                                                                                                 |
| Si desea realizar algún comentario o aportar información al respecto, por favor, utilice el siguiente espacio.                            |                                                                                                                                                 |                                                                                                                                                 |
| 30. En la historia clínica consta que se ha considerado la presencia de diabetes mellitus.                                                |                                                                                                                                                 |                                                                                                                                                 |
| Si desea realizar algún comentario o aportar información al respecto, por favor, utilice el siguiente espacio.                            |                                                                                                                                                 |                                                                                                                                                 |
| 31. En la historia clínica consta que se ha recomendado vacunar de la gripe.                                                              |                                                                                                                                                 |                                                                                                                                                 |
| Si desea realizar algún comentario o aportar información al respecto, por favor, utilice el siguiente espacio.                            |                                                                                                                                                 |                                                                                                                                                 |
| 32. En la historia clínica consta que se ha recomendado vacunar del neumococo.                                                            |                                                                                                                                                 |                                                                                                                                                 |
| Si desea realizar algún comentario o aportar información al respecto, por favor, utilice el siguiente espacio.                            |                                                                                                                                                 |                                                                                                                                                 |
| 33. En la historia clínica consta que personal sanitario (enfermera o reumatólogo) ha realizado monitorización del riesgo cardiovascular. |                                                                                                                                                 |                                                                                                                                                 |
| Si desea realizar algún comentario o aportar información al respecto, por favor, utilice el siguiente espacio.                            |                                                                                                                                                 |                                                                                                                                                 |

Tabla 10. Bloque B: Criterios de calidad de adecuación científico-técnica (continuación).

| CRITERIO CALIDAD                                                                                                                                | RELEVANCIA                                                                                   | FACTIBILIDAD                                                                                 |
|-------------------------------------------------------------------------------------------------------------------------------------------------|----------------------------------------------------------------------------------------------|----------------------------------------------------------------------------------------------|
|                                                                                                                                                 | <div>012345678910</div> <div>●●●●●●●●●●</div> <div>Completo desacuerdoCompleto acuerdo</div> | <div>012345678910</div> <div>●●●●●●●●●●</div> <div>Completo desacuerdoCompleto acuerdo</div> |
| 34. Se ha recogido peso y talla del paciente.                                                                                                   |                                                                                              |                                                                                              |
| Si desea realizar algún comentario o aportar información al respecto, por favor, utilice el siguiente espacio.                                  |                                                                                              |                                                                                              |
| 35. Se ha realizado seguimiento telefónico de cumplimiento de tratamiento con un fármaco modificador de la enfermedad convencional o biológico. |                                                                                              |                                                                                              |
| Si desea realizar algún comentario o aportar información al respecto, por favor, utilice el siguiente espacio.                                  |                                                                                              |                                                                                              |

Tabla 11. Bloque C: Criterios de calidad de estructura.

| CRITERIO CALIDAD                                                                                               | RELEVANCIA                                                                                   | FACTIBILIDAD                                                                                 |
|----------------------------------------------------------------------------------------------------------------|----------------------------------------------------------------------------------------------|----------------------------------------------------------------------------------------------|
|                                                                                                                | <div>012345678910</div> <div>●●●●●●●●●●</div> <div>Completo desacuerdoCompleto acuerdo</div> | <div>012345678910</div> <div>●●●●●●●●●●</div> <div>Completo desacuerdoCompleto acuerdo</div> |
| 36. Existe en la unidad de reumatología una vía preferente para patología sospechosa de inflamatoria.          |                                                                                              |                                                                                              |
| Si desea realizar algún comentario o aportar información al respecto, por favor, utilice el siguiente espacio. |                                                                                              |                                                                                              |
| 37. Existe un mecanismo de asistencia en caso de artritis reumatoide estable que brota.                        |                                                                                              |                                                                                              |
| Si desea realizar algún comentario o aportar información al respecto, por favor, utilice el siguiente espacio. |                                                                                              |                                                                                              |

2. Cuestionario de segunda ronda Delphi.

| CRITERIOS DE CALIDAD                                                                                                                                                                  | PRIMERA RONDA DELPHI  |                   |                     |                       |                   |                     | SEGUNDA RONDA DELPHI                                                                |                                                                                     |
|---------------------------------------------------------------------------------------------------------------------------------------------------------------------------------------|-----------------------|-------------------|---------------------|-----------------------|-------------------|---------------------|-------------------------------------------------------------------------------------|-------------------------------------------------------------------------------------|
|                                                                                                                                                                                       | Relevancia            |                   |                     | Factibilidad          |                   |                     | Relevancia                                                                          | Factibilidad                                                                        |
|                                                                                                                                                                                       | Valoración individual | Mediana (p25-p75) | Grado acuerdo (%≥7) | Valoración individual | Mediana (p25-p75) | Grado acuerdo (%≥7) |  |  |
|                                                                                                                                                                                       |                       |                   |                     |                       |                   |                     |                                                                                     |                                                                                     |
| 1. El tiempo transcurrido entre la petición de interconsulta a reumatología y la primera visita al reumatólogo ha sido inferior a 4 semanas.                                          |                       |                   |                     |                       |                   |                     |                                                                                     |                                                                                     |
| 2. El tiempo transcurrido desde la primera visita a reumatología y el establecimiento del diagnóstico de artritis reumatoide ha sido inferior a 2 semanas.                            |                       |                   |                     |                       |                   |                     |                                                                                     |                                                                                     |
| 3. El tiempo transcurrido desde la primera visita en reumatología y el inicio de metotrexato o primer fármaco modificador de la enfermedad convencional ha sido inferior a 2 semanas. |                       |                   |                     |                       |                   |                     |                                                                                     |                                                                                     |
| 5. En la historia clínica consta que se ha recomendado alcanzar y mantener el peso ideal.                                                                                             |                       |                   |                     |                       |                   |                     |                                                                                     |                                                                                     |
| 6. En la historia clínica consta que se ha recomendado mantener una buena salud periodontal.                                                                                          |                       |                   |                     |                       |                   |                     |                                                                                     |                                                                                     |

| CRITERIOS DE CALIDAD                                                                                                                                               | PRIMERA RONDA DELPHI  |                   |                     |                       |                   |                     | SEGUNDA RONDA DELPHI                                                                |                                                                                     |
|--------------------------------------------------------------------------------------------------------------------------------------------------------------------|-----------------------|-------------------|---------------------|-----------------------|-------------------|---------------------|-------------------------------------------------------------------------------------|-------------------------------------------------------------------------------------|
|                                                                                                                                                                    | Relevancia            |                   |                     | Factibilidad          |                   |                     | Relevancia                                                                          | Factibilidad                                                                        |
|                                                                                                                                                                    | Valoración individual | Mediana (p25-p75) | Grado acuerdo (%≥7) | Valoración individual | Mediana (p25-p75) | Grado acuerdo (%≥7) |  |  |
| 8. En la historia clínica consta que se ha controlado al paciente cada mes hasta alcanzar remisión o baja actividad de la enfermedad                               |                       |                   |                     |                       |                   |                     |                                                                                     |                                                                                     |
| 16. En la historia clínica consta que el paciente ha sido informado sobre la terapia por objetivos.                                                                |                       |                   |                     |                       |                   |                     |                                                                                     |                                                                                     |
| 20. Al paciente se le ha prescrito doble o triple terapia con un fármaco modificador de la enfermedad convencional antes de prescribir el primer agente biológico. |                       |                   |                     |                       |                   |                     |                                                                                     |                                                                                     |
| 26. Se han realizado otras técnicas de imagen, como ecografía o resonancia magnética, para monitorizar la actividad inflamatoria subclínica                        |                       |                   |                     |                       |                   |                     |                                                                                     |                                                                                     |
| 33. En la historia clínica consta que personal sanitario (enfermera o reumatólogo) ha realizado monitorización del riesgo cardiovascular                           |                       |                   |                     |                       |                   |                     |                                                                                     |                                                                                     |
| 35. Se ha realizado un seguimiento telefónico de cumplimiento de tratamiento con fármaco modificador de la enfermedad convencional o biológico                     |                       |                   |                     |                       |                   |                     |                                                                                     |                                                                                     |
| 36. Existe en la unidad de Reumatología una vía preferente para patología sospechosa de inflamatoria                                                               |                       |                   |                     |                       |                   |                     |                                                                                     |                                                                                     |
